# Supplementary material for: Ab initio studies on the spin-forbidden cooling transitions of the LiRb molecule
Source: Royal Society of Chemistry journal article supplement (doi:10.1039/c6cp01618a), 2016-01-01
Supplement: c6cp01618a1.pdf [file c6cp01618a1.pdf]

Table I. Parameters of the MLR potential energy functions for LiRb ( $X^1\Sigma^+$ ,  $b^3\Pi_0$ ,  $b^3\Pi_1$ , and  $b^3\Pi_2$ ); ( $D_e$ ,  $C_6$ ,  $C_8$ ,  $C_{10}$ , and RMS are in  $\text{cm}^{-1}$  and  $R_e$  in Å).

|             | $X^1\Sigma^+$                      | $b^3\Pi_0$                         | $b^3\Pi_1$                       | $b^3\Pi_2$                         |
|-------------|------------------------------------|------------------------------------|----------------------------------|------------------------------------|
| $\Phi_1$    | $-1.65954937025401 \times 10^{-1}$ | $-3.78398704267304 \times 10^{-1}$ | $-4.049457391207 \times 10^{-1}$ | $-3.96253964468881 \times 10^{-1}$ |
| $\Phi_2$    | -1.47307939648485                  | -2.08602333963445                  | -2.215351035993                  | -2.20213436424538                  |
| $\Phi_3$    | -1.97338379582326                  | -2.56927140910410                  | -3.264558950536                  | -2.35173837004823                  |
| $\Phi_4$    | -1.38027909025489                  | -1.43049147334407                  | -3.050086921839                  | $-5.91220913105060 \times 10^{-1}$ |
| $\Phi_5$    | -3.10008460420709                  | 1.78225976899681                   | -1.710834154652                  | 2.46508485791987                   |
| $\Phi_6$    | $2.76700727829455 \times 10^{-2}$  | 7.66451872829829                   | 5.081856378213                   | $2.57455631974559 \times 10^{-2}$  |
| $\Phi_7$    | $3.87369094379414 \times 10^1$     | -7.14854447188408                  | 7.086886475278                   | $-2.64447134485736 \times 10^1$    |
| $\Phi_8$    | $2.53584028381134 \times 10^1$     | $-5.08900091944738 \times 10^1$    | $-2.778706352292 \times 10^1$    | $-3.50882103348123 \times 10^1$    |
| $\Phi_9$    | $-2.00382611469885 \times 10^2$    | $2.49125186839839 \times 10^1$     | $-1.421723602772 \times 10^{-3}$ | $8.31944656218654 \times 10^1$     |
| $\Phi_{10}$ | $-1.70200286729326 \times 10^2$    | $1.93081077883750 \times 10^2$     | $1.556169646790 \times 10^2$     | $1.35634319407802 \times 10^2$     |
| $\Phi_{11}$ | $5.65969408006438 \times 10^2$     | $-7.22734817151931 \times 10^1$    | $-3.085538829674 \times 10^1$    | $-2.11914011262861 \times 10^2$    |
| $\Phi_{12}$ | $6.31900726303575 \times 10^2$     | $-4.97189489019564 \times 10^2$    | $-4.960255896665 \times 10^2$    | $-3.80469263366913 \times 10^2$    |
| $\Phi_{13}$ | $-7.01912308117566 \times 10^2$    | $-2.68640518836253 \times 10^{-4}$ | $-8.906121300635 \times 10^1$    | $2.31105600260294 \times 10^2$     |
| $\Phi_{14}$ | $-1.06930287706414 \times 10^3$    | $6.62350529372493 \times 10^2$     | $6.889317536016 \times 10^2$     | $5.68694739304169 \times 10^2$     |
| $\Phi_{15}$ | $1.93617920751443 \times 10^2$     | $2.06562155454963 \times 10^2$     | $2.994276912088 \times 10^2$     | $-2.55452230898177 \times 10^{-5}$ |
| $\Phi_{16}$ | $7.37566903911735 \times 10^2$     | $-3.46134451649826 \times 10^2$    | $-3.600138450378 \times 10^2$    | $-3.55020831467025 \times 10^2$    |
| $\Phi_{17}$ | $2.61902215894053 \times 10^2$     | $-1.85137632969633 \times 10^2$    | $-2.204552708352 \times 10^2$    | $-1.44189857126391 \times 10^2$    |
| $D_e$       | $5.92248703376990 \times 10^3$     | $8.12171680858926 \times 10^3$     | $8.173948239463 \times 10^3$     | $8.13029649310318 \times 10^3$     |
| $R_{ef}$    | 4.17455163720961                   | 4.83710057104409                   | 4.524140514933                   | 5.19631239923550                   |
| $R_e$       | 3.50842065424474                   | 3.42298734382155                   | 3.425183001402                   | 3.42521229008978                   |
| $C_6$       | $1.40363992679874 \times 10^7$     | $2.10300247441515 \times 10^7$     | $2.008398463231 \times 10^7$     | $1.62123027435094 \times 10^7$     |
| $C_8$       | $3.15014624259183 \times 10^8$     | $2.06762595786173 \times 10^8$     | $2.389271963868 \times 10^8$     | $1.92915092290023 \times 10^8$     |
| $C_{10}$    | $1.38241918191638 \times 10^{10}$  | $1.33307197656858 \times 10^{10}$  | $1.633636391834 \times 10^{10}$  | $1.33307197424527 \times 10^{10}$  |
| RMS         | 0.913                              | 0.293                              | 0.408                            | 0.671                              |

Table II. Parameters of the MLR potential energy functions for KRb ( $X^1\Sigma^+$ ,  $b^3\Pi_0$ ,  $b^3\Pi_1$ , and  $b^3\Pi_2$ ); ( $D_e$ ,  $C_6$ ,  $C_8$ ,  $C_{10}$ , and RMS are in  $\text{cm}^{-1}$  and  $R_e$  in Å).

|             | $X^1\Sigma^+$                  | $b^3\Pi_0$                      | $b^3\Pi_1$                      | $b^3\Pi_2$                      |
|-------------|--------------------------------|---------------------------------|---------------------------------|---------------------------------|
| $\Phi_1$    | $1.715683332194\times 10^{-7}$ | $-8.026327323369\times 10^{-1}$ | $-7.030930216457\times 10^{-1}$ | $-8.252245908588\times 10^{-1}$ |
| $\Phi_2$    | $2.910825628023\times 10^{-3}$ | -4.963239574780                 | -6.011555023005                 | -5.754051354585                 |
| $\Phi_3$    | $8.964799417088\times 10^{-1}$ | -8.832726056703                 | $-1.043270036803\times 10^1$    | $-1.017830777296\times 10^1$    |
| $\Phi_4$    | 2.286455141751                 | $-1.294831196322\times 10^1$    | $-1.469914785791\times 10^1$    | $-1.450478148265\times 10^1$    |
| $\Phi_5$    | 4.747102006155                 | $-1.552121292253\times 10^1$    | $-1.763222805939\times 10^1$    | $-1.755518871064\times 10^1$    |
| $\Phi_6$    | -2.255859147812                | $-2.078211039330\times 10^1$    | $-2.406492775135\times 10^1$    | $-2.522306755104\times 10^1$    |
| $\Phi_7$    | $-3.918374417797\times 10^1$   | $-3.346609570984\times 10^1$    | $-3.255958806778\times 10^1$    | $-3.414496674951\times 10^1$    |
| $\Phi_8$    | $3.872867266058\times 10^1$    | $-1.791370269797\times 10^{-5}$ | $1.108525552957\times 10^1$     | $1.946689748004\times 10^1$     |
| $\Phi_9$    | $3.939721964050\times 10^2$    | $8.702239465175\times 10^1$     | $7.396373224446\times 10^1$     | $8.987905385713\times 10^1$     |
| $\Phi_{10}$ | $1.422315882231\times 10^2$    | $-6.816557317230\times 10^1$    | $-1.339887601156\times 10^2$    | $-1.591465425363\times 10^2$    |
| $\Phi_{11}$ | $-1.437320225593\times 10^3$   | $-4.525849115371\times 10^2$    | $-4.536199203378\times 10^2$    | $-5.217263023272\times 10^2$    |
| $\Phi_{12}$ | $-1.370602980416\times 10^3$   | $-1.534335647194\times 10^2$    | $-1.271898306412\times 10^1$    | $-2.224465632295\times 10^{-3}$ |
| $\Phi_{13}$ | $2.175423127586\times 10^3$    | $7.152874187306\times 10^2$     | $7.648149456145\times 10^2$     | $8.845841017115\times 10^2$     |
| $\Phi_{14}$ | $3.400823738586\times 10^3$    | $5.241810781065\times 10^2$     | $3.678642465431\times 10^2$     | $4.218059822592\times 10^2$     |
| $\Phi_{15}$ | $-3.433514638602\times 10^2$   | $-4.724866229763\times 10^2$    | $-5.703017603885\times 10^2$    | $-6.379874610370\times 10^2$    |
| $\Phi_{16}$ | $-2.491254021484\times 10^3$   | $-6.218924644594\times 10^2$    | $-5.724118331690\times 10^2$    | $-6.381349777965\times 10^2$    |
| $\Phi_{17}$ | $-1.035511984572\times 10^3$   | $-1.755752073924\times 10^2$    | $-1.370694368434\times 10^2$    | $-1.522923854416\times 10^2$    |
| $D_e$       | $3.448802115964\times 10^3$    | $6.041207109500\times 10^3$     | $6.070473227620\times 10^3$     | $6.070128593453\times 10^3$     |
| $R_{ef}$    | 5.970357086365                 | 7.289408879436                  | 7.415067260591                  | 7.408836214314                  |
| $R_e$       | 4.168255833410                 | 4.173686985404                  | 4.177248133287                  | 4.182027322588                  |
| $C_6$       | $3.206438724187\times 10^7$    | $9.358387394682\times 10^6$     | $7.226601885029\times 10^6$     | $6.782585935388\times 10^6$     |
| $C_8$       | $3.169173120000\times 10^8$    | $3.133481705083\times 10^8$     | $9.274106105677\times 10^6$     | $1.805047335392\times 10^8$     |
| $C_{10}$    | $1.333071974400\times 10^{10}$ | $1.333886564720\times 10^{10}$  | $1.548205956765\times 10^9$     | $8.941686782998\times 10^9$     |
| RMS         | 0.518                          | 0.325                           | 0.318                           | 0.294                           |

TABLE III. The vibrational levels ( $N = 0$ ) for LiRb.

| $\nu$ | $X^1\Sigma^+$ | $b^3\Pi_0$ | $b^3\Pi_1$ | $b^3\Pi_2$ | $B^1\Pi$ |
|-------|---------------|------------|------------|------------|----------|
| 0     | 95.9          | 93.9       | 93.9       | 94.1       | 56.1     |
| 1     | 286.3         | 280.8      | 280.8      | 281.2      | 164.4    |
| 2     | 474.5         | 466.6      | 466.5      | 466.9      | 266.9    |
| 3     | 660.6         | 651.0      | 650.9      | 651.3      | 363.6    |
| 4     | 844.4         | 834.0      | 834.0      | 834.2      | 454.6    |
| 5     | 1026.1        | 1015.6     | 1015.5     | 1015.7     | 539.9    |
| 6     | 1205.5        | 1195.6     | 1195.6     | 1195.7     | 619.8    |
| 7     | 1382.8        | 1374.2     | 1374.1     | 1374.3     | 694.3    |
| 8     | 1557.8        | 1551.3     | 1551.1     | 1551.3     | 763.8    |
| 9     | 1730.6        | 1726.9     | 1726.5     | 1726.8     | 828.6    |
| 10    | 1901.1        | 1900.9     | 1900.3     | 1900.8     | 888.9    |
| 11    | 2069.2        | 2073.4     | 2072.7     | 2073.2     | 945.0    |
| 12    | 2235.0        | 2244.5     | 2243.5     | 2244.1     | 997.2    |
| 13    | 2398.3        | 2413.9     | 2412.7     | 2413.5     | 1045.7   |
| 14    | 2559.2        | 2581.9     | 2580.4     | 2581.3     | 1090.9   |
| 15    | 2717.6        | 2748.4     | 2746.6     | 2747.6     | 1132.9   |
| 16    | 2873.4        | 2913.3     | 2911.2     | 2912.3     | 1171.8   |
| 17    | 3026.6        | 3076.7     | 3074.3     | 3075.4     | 1207.7   |
| 18    | 3177.2        | 3238.5     | 3235.8     | 3236.9     | 1240.7   |
| 19    | 3325.1        | 3398.8     | 3395.7     | 3396.9     | 1270.7   |
| 20    | 3470.3        | 3557.5     | 3554.0     | 3555.2     | 1297.9   |
| 21    | 3612.6        | 3714.6     | 3710.6     | 3711.9     | 1322.1   |
| 22    | 3752.1        | 3870.1     | 3865.6     | 3867.0     | 1343.5   |
| 23    | 3888.5        | 4024.0     | 4018.9     | 4020.4     | 1361.9   |
| 24    | 4021.9        | 4176.2     | 4170.5     | 4172.1     | 1377.4   |
| 25    | 4152.1        | 4326.7     | 4320.3     | 4322.1     | 1390.0   |
| 26    | 4279.0        | 4475.5     | 4468.4     | 4470.4     | 1399.9   |
| 27    | 4402.4        | 4622.6     | 4614.8     | 4616.9     | 1407.0   |
| 28    | 4522.4        | 4767.9     | 4759.3     | 4761.7     | 1411.8   |
| 29    | 4638.7        | 4911.4     | 4901.9     | 4904.6     | 1414.4   |
| 30    | 4751.1        | 5053.1     | 5042.7     | 5045.6     | –        |
| 31    | 4859.6        | 5192.8     | 5181.5     | 5184.8     | –        |
| 32    | 4964.0        | 5330.7     | 5318.4     | 5322.0     | –        |
| 33    | 5064.1        | 5466.5     | 5453.3     | 5457.2     | –        |
| 34    | 5159.7        | 5600.4     | 5586.0     | 5590.4     | –        |
| 35    | 5250.7        | 5732.1     | 5716.7     | 5721.5     | –        |
| 36    | 5336.8        | 5861.6     | 5845.1     | 5850.5     | –        |
| 37    | 5417.8        | 5988.9     | 5971.3     | 5977.2     | –        |
| 38    | 5493.6        | 6113.8     | 6095.1     | 6101.7     | –        |
| 39    | 5563.8        | 6236.4     | 6216.5     | 6223.8     | –        |
| 40    | 5628.3        | 6356.4     | 6335.3     | 6343.4     | –        |

|    |        |        |        |        |   |
|----|--------|--------|--------|--------|---|
| 41 | 5686.8 | 6473.7 | 6451.5 | 6460.5 | - |
| 42 | 5739.0 | 6588.4 | 6564.9 | 6574.9 | - |
| 43 | 5784.8 | 6700.1 | 6675.5 | 6686.6 | - |
| 44 | 5824.0 | 6808.9 | 6783.1 | 6795.3 | - |
| 45 | 5856.6 | 6914.5 | 6887.6 | 6900.9 | - |
| 46 | 5882.4 | 7016.8 | 6988.7 | 7003.4 | - |
| 47 | 5901.4 | 7115.7 | 7086.5 | 7102.5 | - |
| 48 | 5913.6 | 7211.0 | 7180.6 | 7198.1 | - |
| 49 | -      | 7302.4 | 7270.9 | 7290.0 | - |
| 50 | -      | 7389.8 | 7357.2 | 7378.0 | - |
| 51 | -      | 7473.1 | 7439.4 | 7461.8 | - |
| 52 | -      | 7551.9 | 7517.2 | 7541.4 | - |
| 53 | -      | 7626.1 | 7590.4 | 7616.4 | - |
| 54 | -      | 7695.5 | 7658.8 | 7686.8 | - |
| 55 | -      | 7759.8 | 7722.2 | 7752.1 | - |
| 56 | -      | 7818.9 | 7780.4 | 7812.4 | - |
| 57 | -      | 7872.5 | 7833.3 | 7867.3 | - |
| 58 | -      | 7920.7 | 7880.8 | 7916.8 | - |
| 59 | -      | 7963.2 | 7922.7 | 7960.7 | - |
| 60 | -      | 8000.2 | 7959.0 | 7999.1 | - |
| 61 | -      | 8031.6 | 7989.9 | 8031.9 | - |
| 62 | -      | 8057.7 | 8015.4 | 8059.3 | - |
| 63 | -      | 8078.5 | 8035.8 | 8081.5 | - |
| 64 | -      | 8094.4 | 8051.4 | 8098.8 | - |
| 65 | -      | 8105.9 | 8062.7 | 8111.5 | - |
| 66 | -      | 8113.6 | 8070.2 | 8120.2 | - |
| 67 | -      | 8118.2 | 8074.6 | 8125.7 | - |
| 68 | -      | 8120.6 | 8076.9 | 8128.7 | - |
| 69 | -      | -      | -      | 8130.1 | - |

---

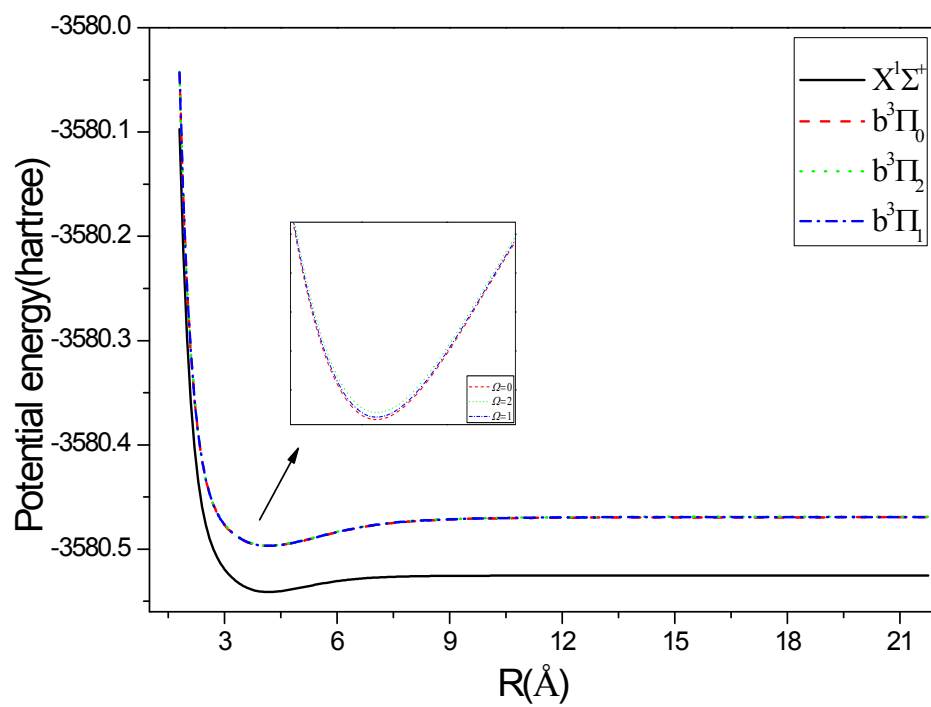

FIG. 1. *Ab initio* PECs of KRb for the ground state  $X^1\Sigma^+$  and the SOC effect of the  $b^3\Pi$  state. The inset figure shows the enlarged SOC effect of the  $b^3\Pi$  state around the equilibrium position  $R_e$ .
